# Supplementary material for: Astaxanthin alleviates lipopolysaccharide-induced acute lung injury by suppressing ferroptosis
Source: Royal Society of Chemistry journal article supplement (doi:10.1039/d3fo01727c), 2023-01-01

Fer-1+LPS

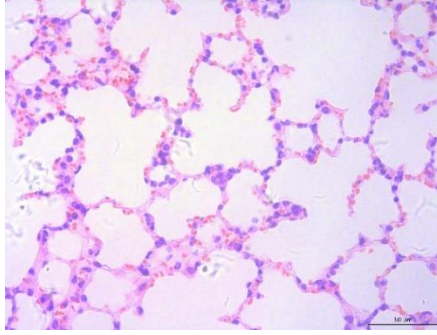

AST(1 $\mu$ M)+LPS

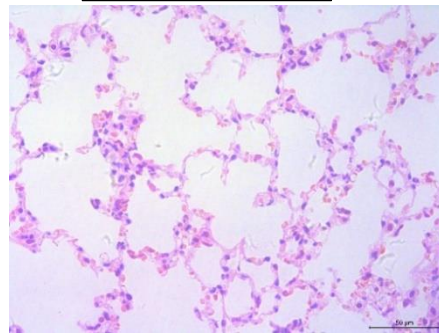

AST(10 $\mu$ M)+LPS

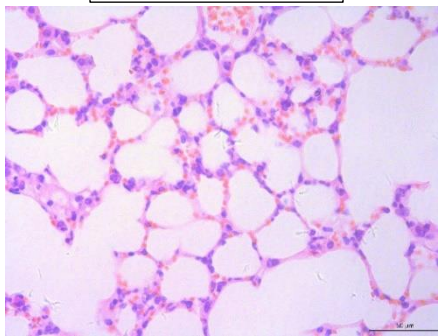

**Masson staining images of the lung tissues.**

Control

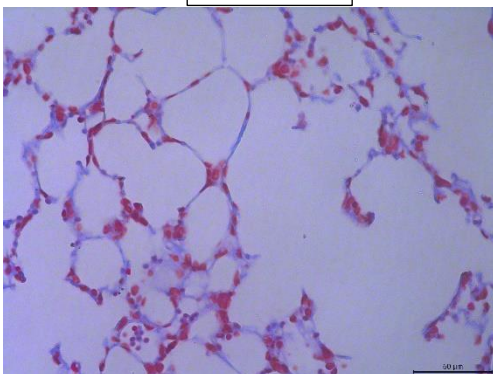

LPS

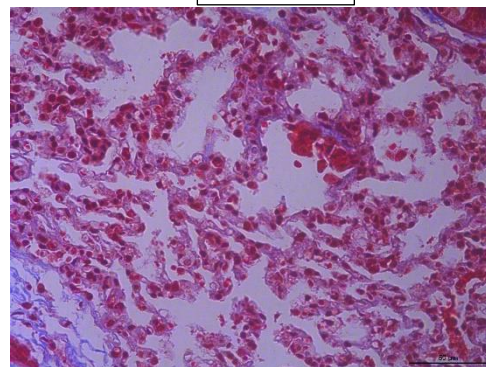

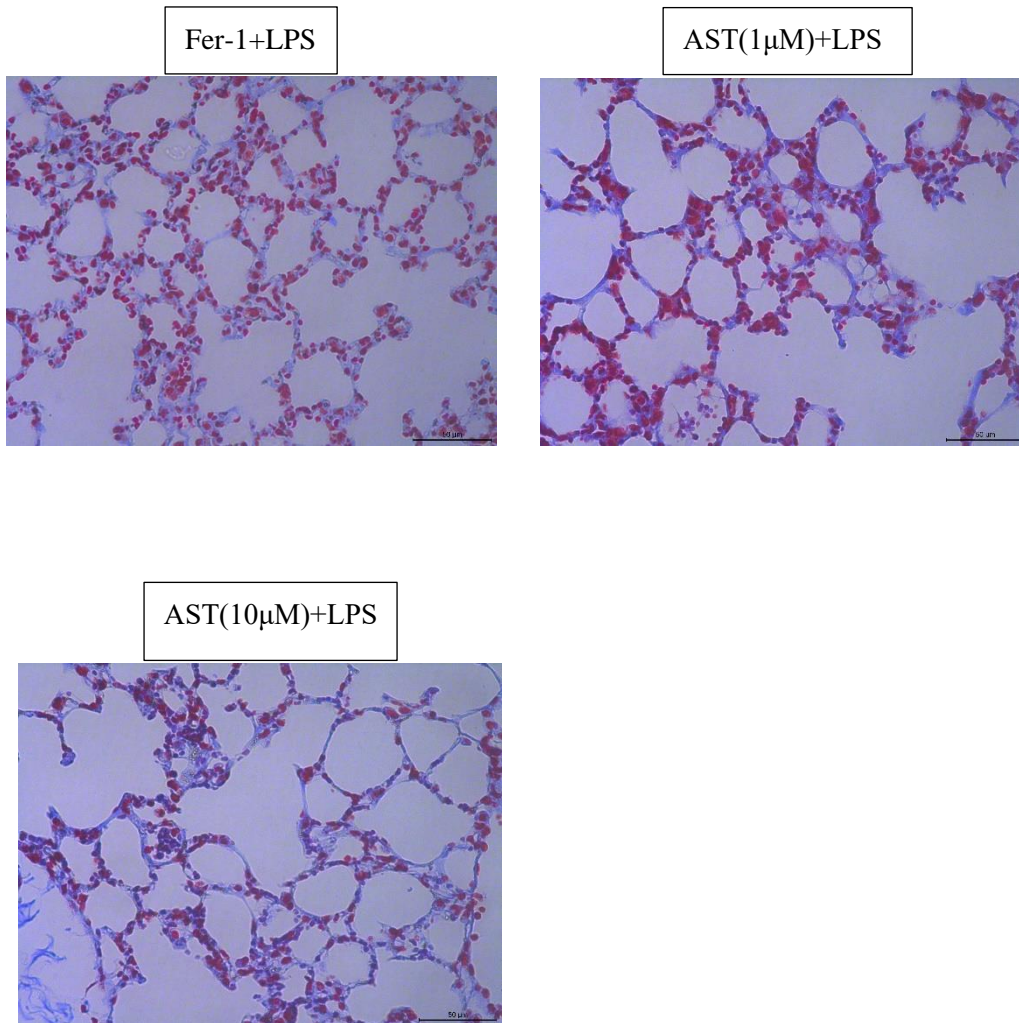

**Fig.1(F):** The raw data of Fig.1(F) is detailed in excel (Elisa, IL-1 $\beta$ ).

**Fig.1(G):** The raw data of Fig.1(G) is detailed in excel (Elisa, IL-6).

**Fig.1(H):** The raw data of Fig.1(H) is detailed in excel (Elisa, TNF- $\alpha$ ).

**Figure 2 AST reduced oxidative stress during LPS-induced ALI.**

**Fig.2(A):** The raw data of Fig.2(A) is detailed in excel (Serum GSH).

**Fig.2(B):** The raw data of Fig.2(B) is detailed in excel (Tissue GSH).

**Fig.2(C):** The raw data of Fig.2(C) is detailed in excel (Serum MDA).

**Fig.2(D):** The raw data of Fig.2(D) is detailed in excel (Tissue MDA).

**Fig.2(E):** DHE fluorescence images of the mice lung tissues.

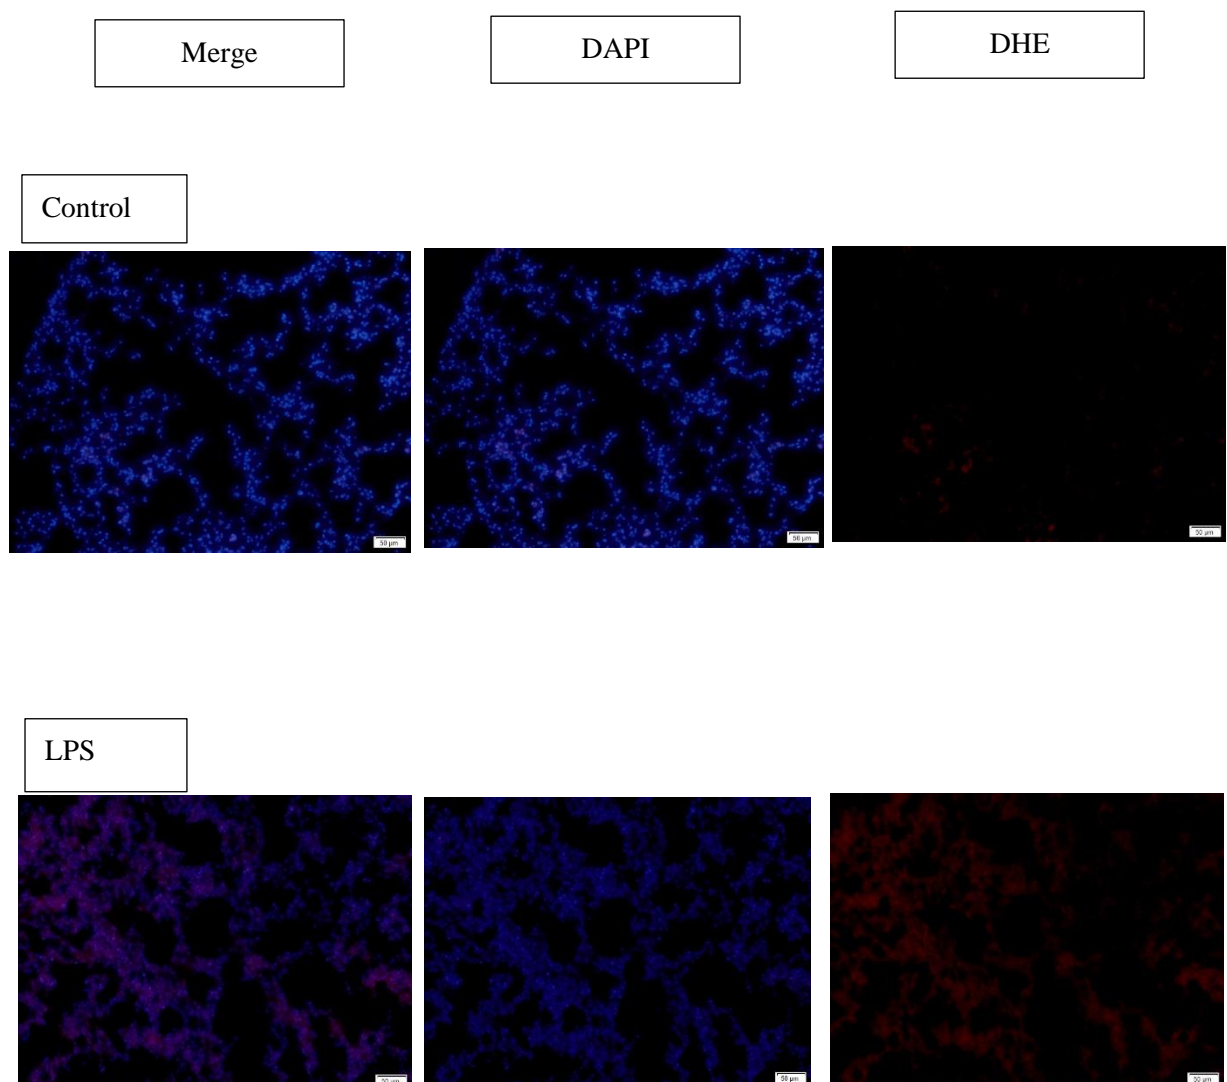

Fer-1+LPS

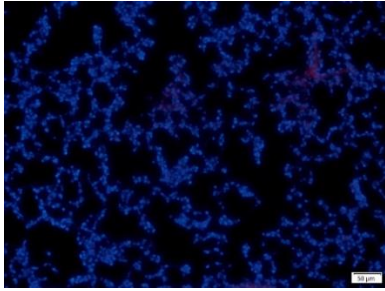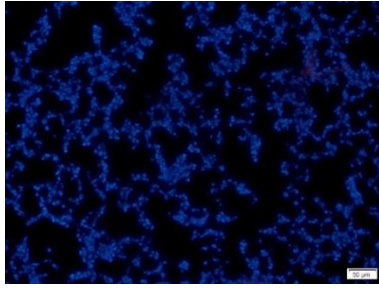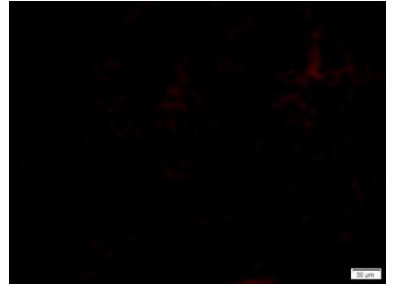

AST(1μM)+LPS

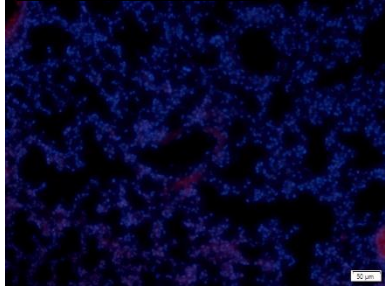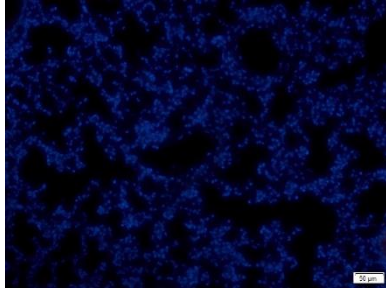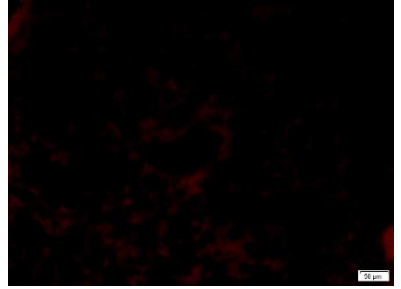

AST(10μM)+LPS

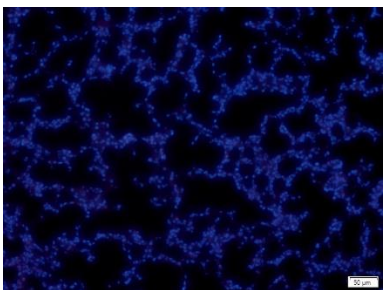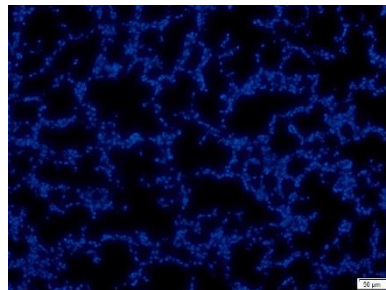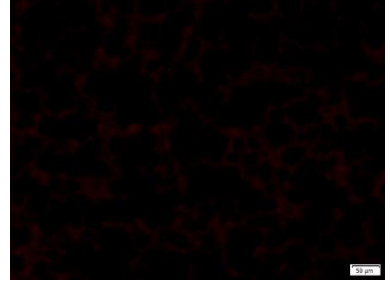

**Figure 3 AST inhibits LPS-induced ALI and ferroptosis *in vivo*.**

**Fig.3(A-C):** Molecular docking of AST and Gpx4.

**Fig.3(A):**

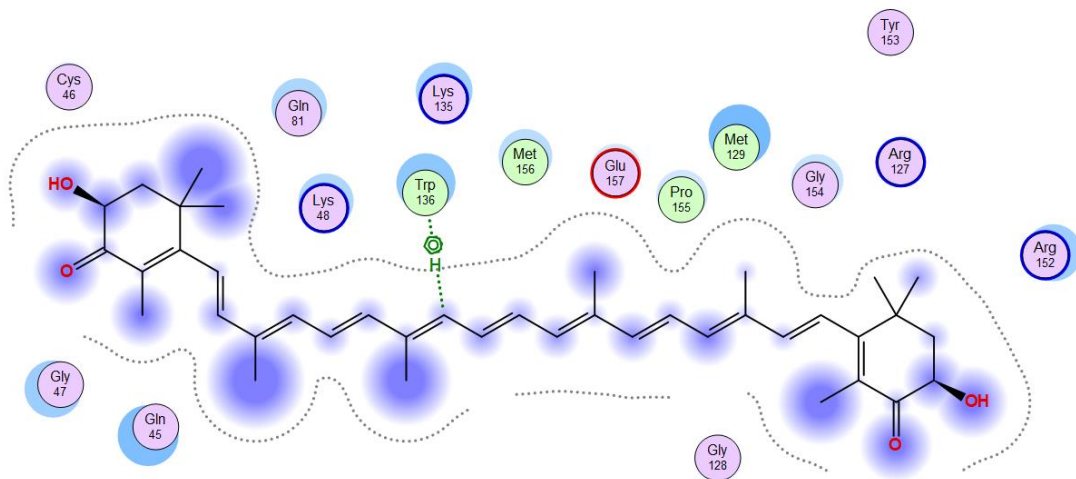

**Fig.3(B):**

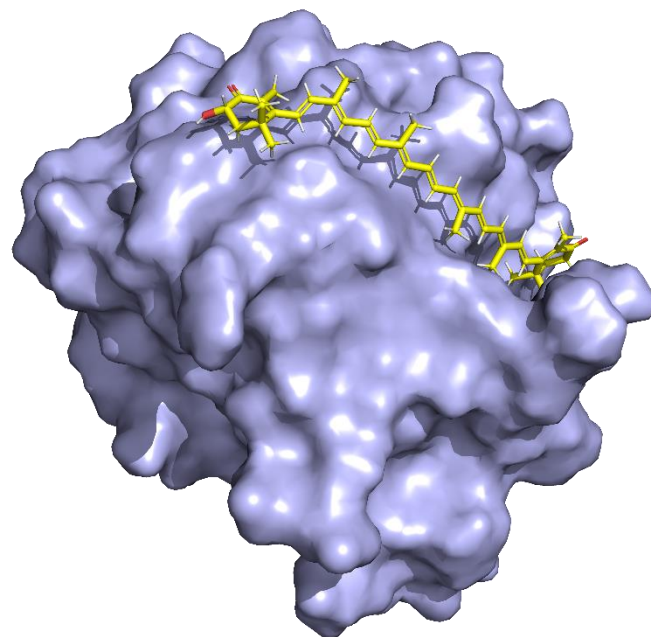

**Fig.3(C):**

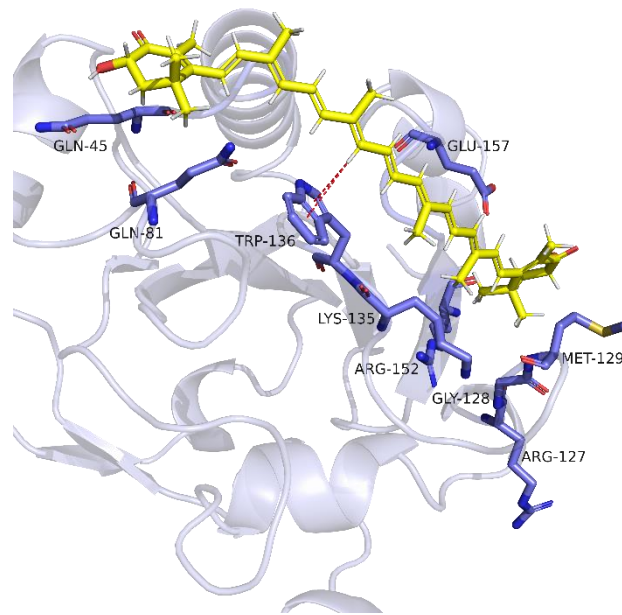

**Fig.3(D):**

Western blots for GPX4 in mice lung tissues.

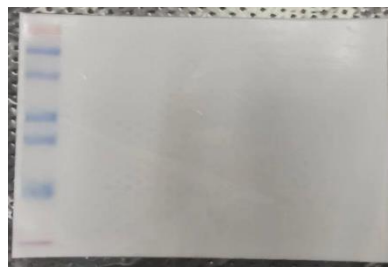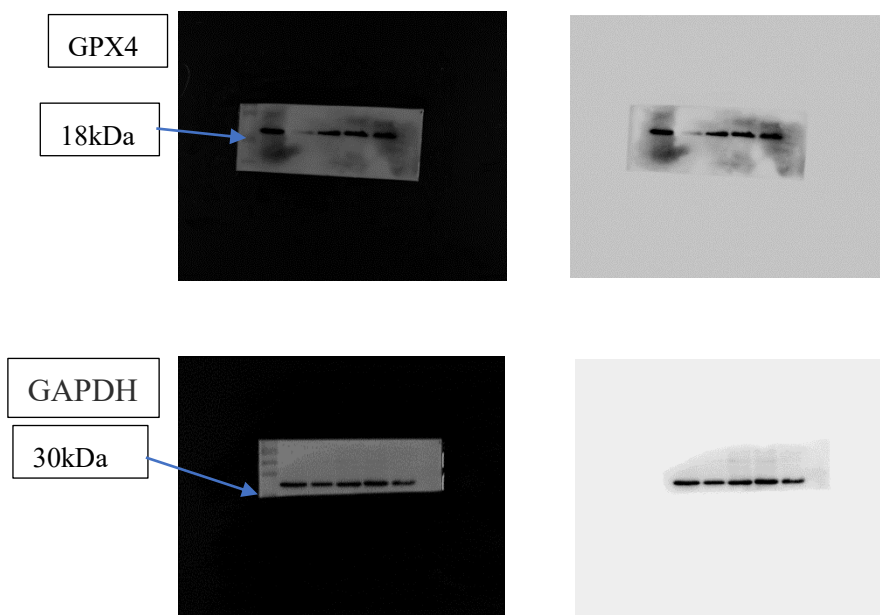

GPX4

18kDa

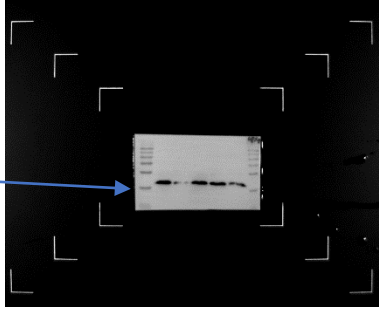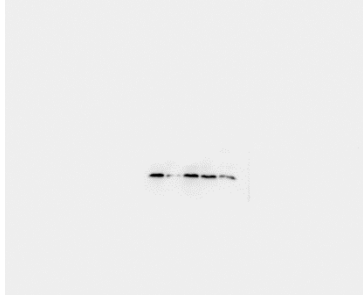

GAPDH

30kDa

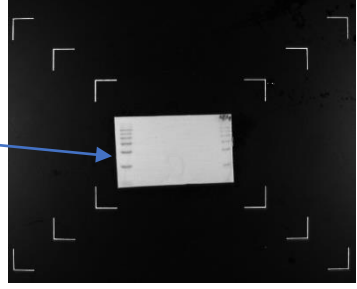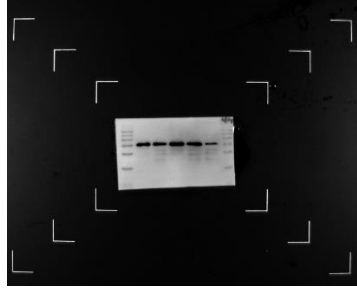

GPX4

18kDa

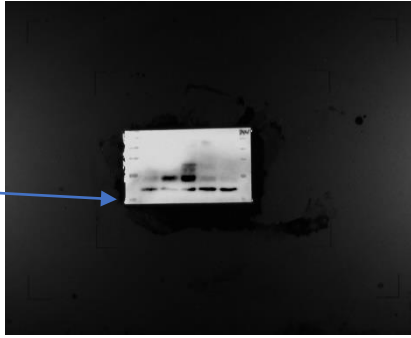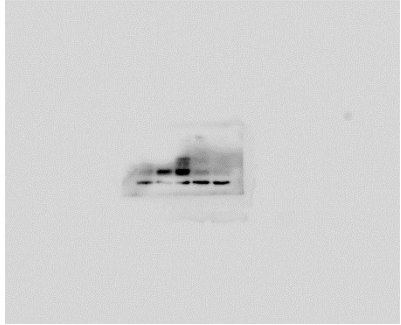

GAPDH

30kDa

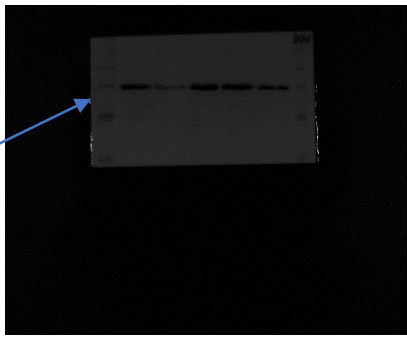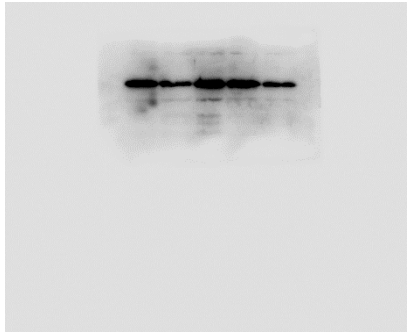



**Fig.3(E):** The raw data of Fig.3(E) is detailed in excel (Relative protein expression, mouse- GPX4/GAPDH).

**Fig.3(F):** The raw data of Fig.3(F) is detailed in excel (Serum iron).

**Fig.3(G):** The raw data of Fig.3(G) is detailed in excel (Tissue iron).

**Fig.3(H):** Immunohistochemistry scores for GPX4 in mice lung tissues.

**Fig.3(I):** Immunohistochemistry staining for GPX4 in mice lung tissues.

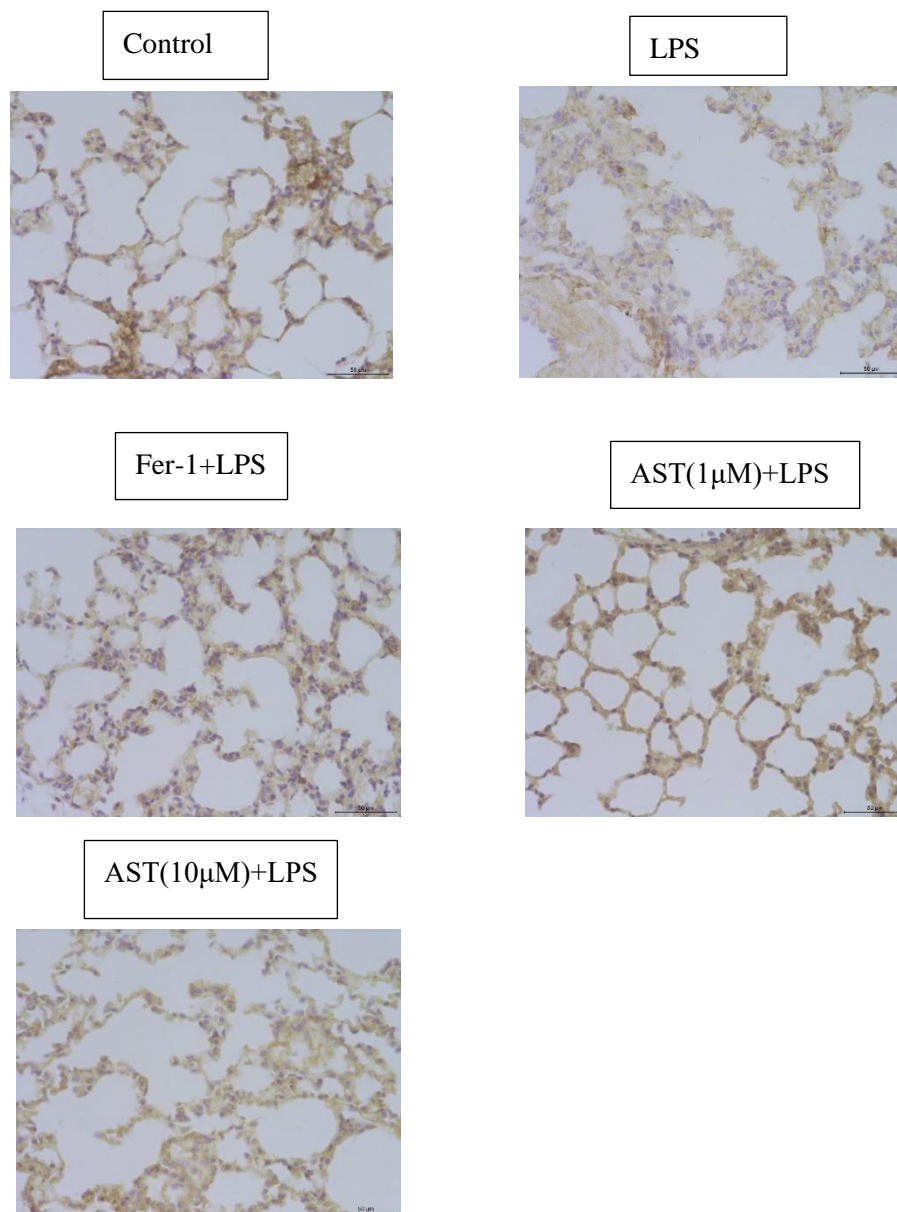

**Fig.3(J):** The TEM images of mice

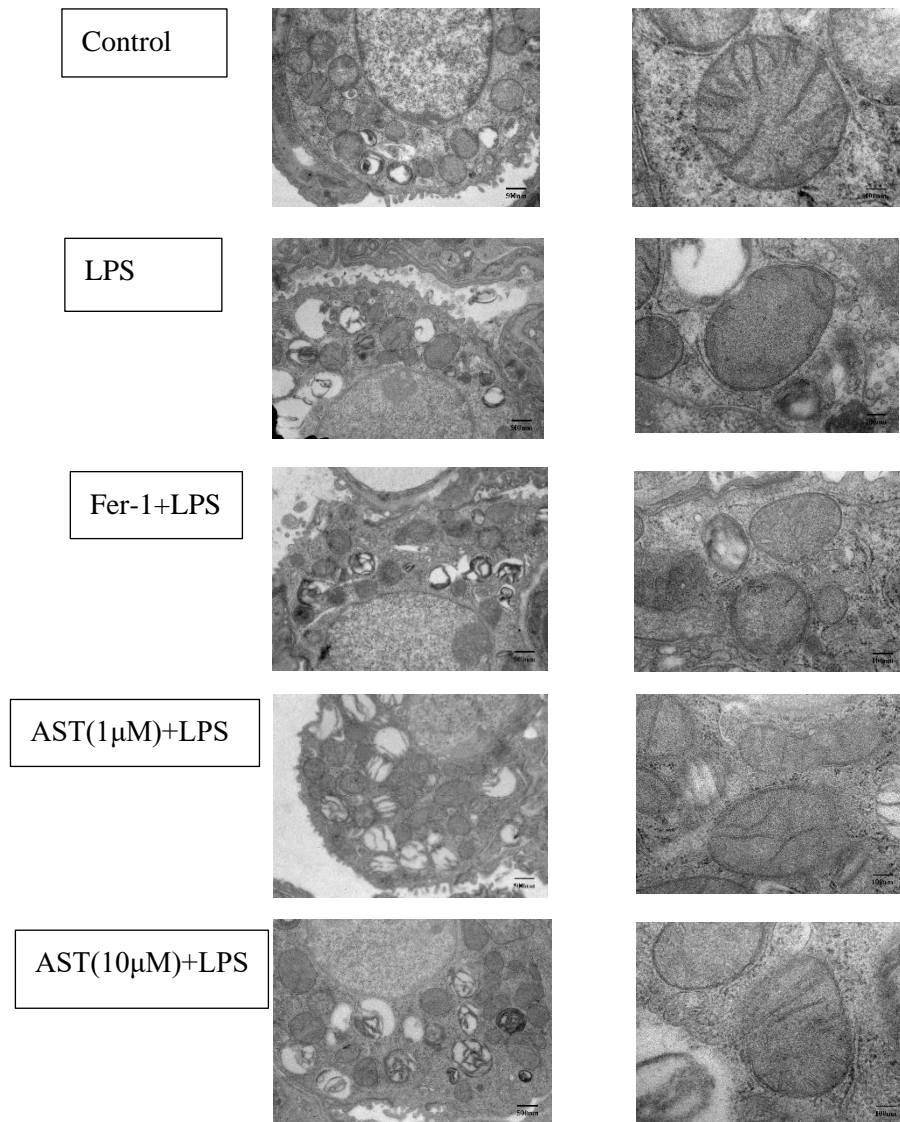

**Figure 4 AST reduced LPS-induced lipid peroxidation and ferroptosis in MLE-12**

cells.

**Fig.4(A):** The raw data of Fig.4(A) is detailed in excel (Cell viability).

**Fig.4(B):** The raw data of Fig.4(B) is detailed in excel (Cell MDA).

**Fig.4(C):** The raw data of Fig.4(C) is detailed in excel (Cell GSH).

**Fig.4(D):** Staining of Mito Tracker

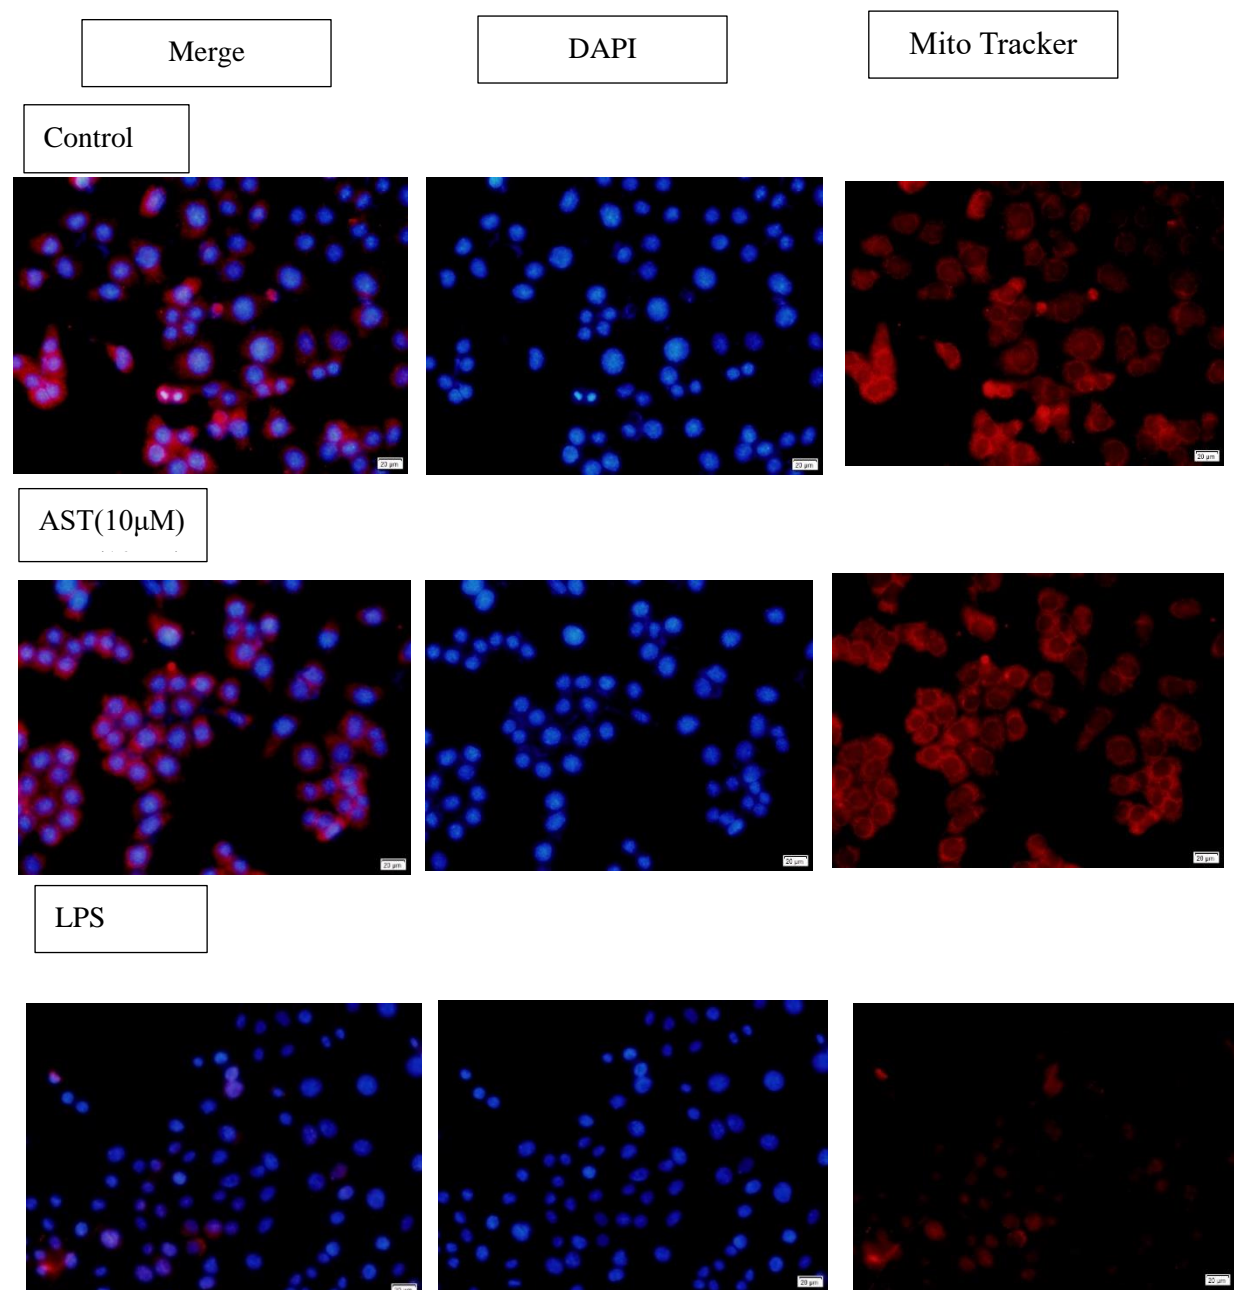

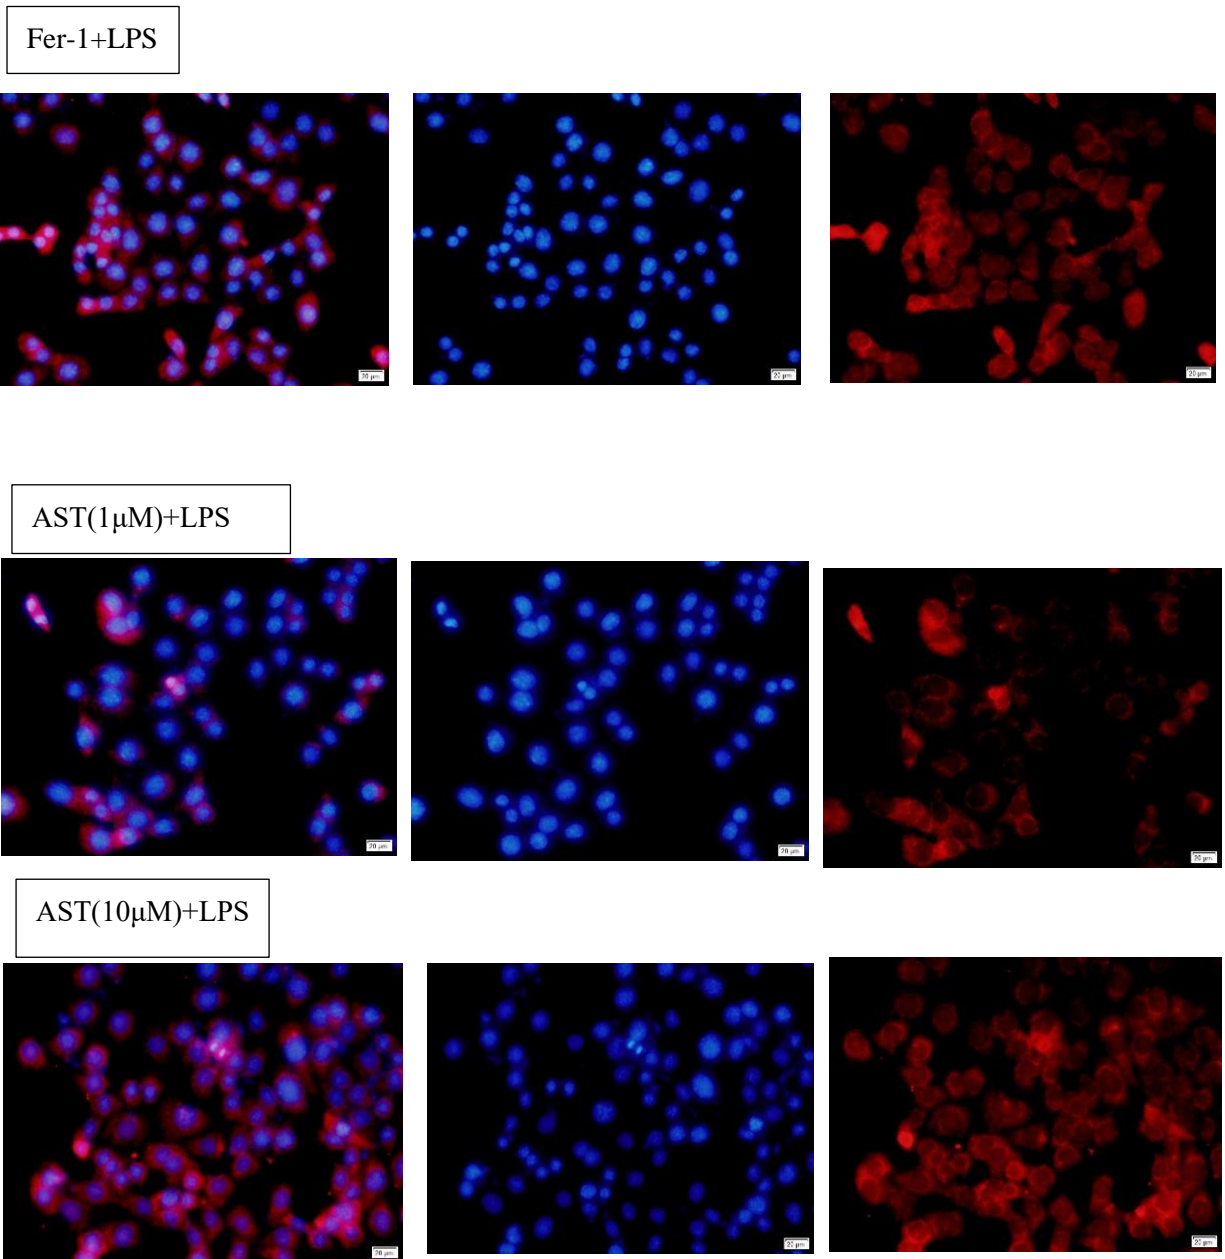

**Fig.4(E):** Representative images of fluorescence probe for ROS in MLE-12 cells

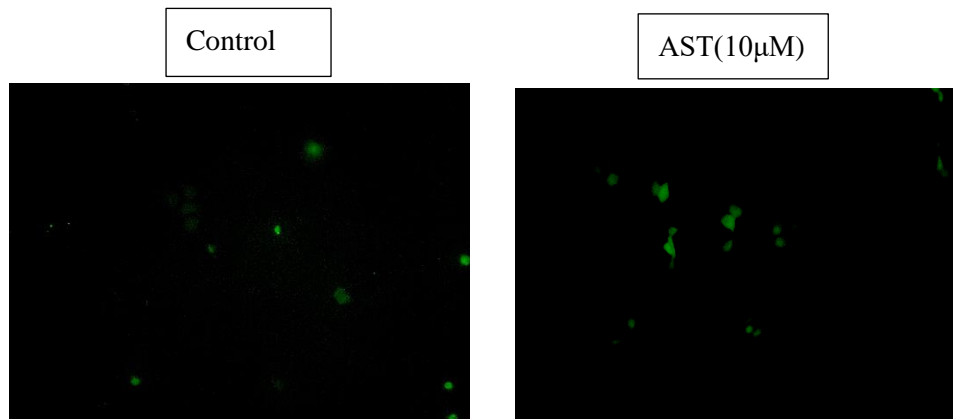

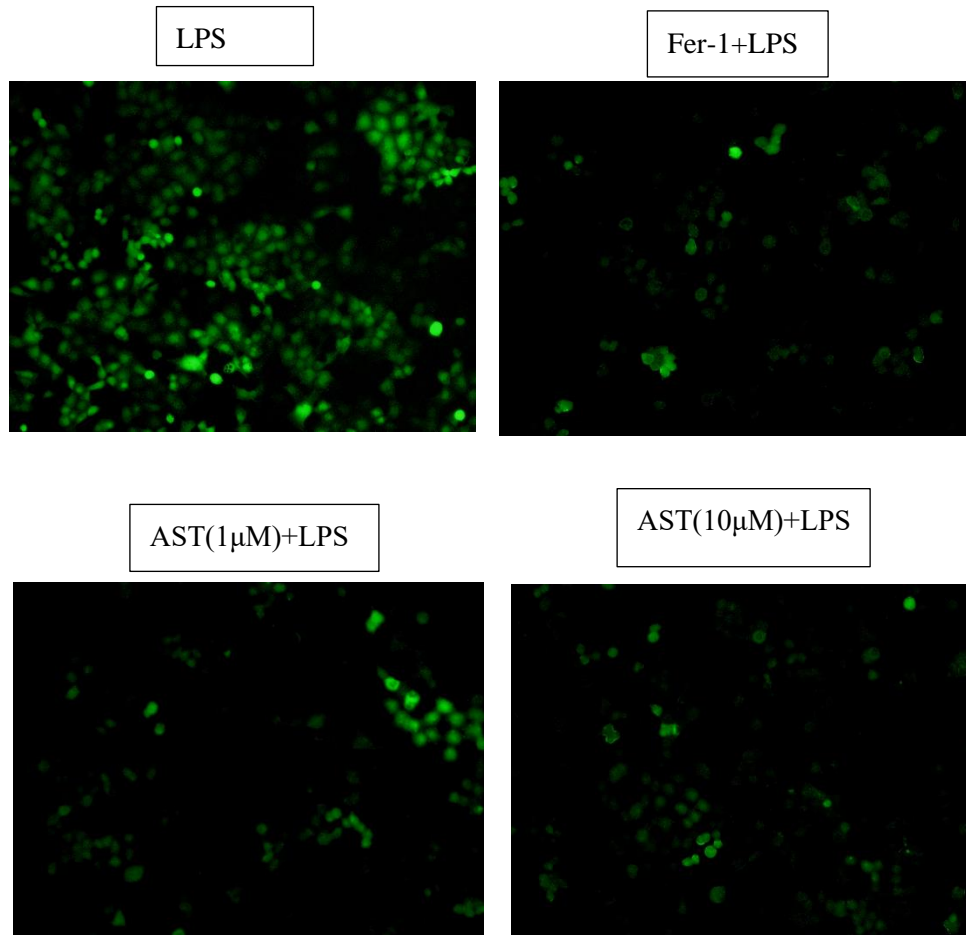

**Fig.4(F):** The raw data of Fig.4(F) is detailed in excel (Relative mRNA expression of GPX4).

**Fig.4(G):** The protein level of GPX4 in MLE-12 cells

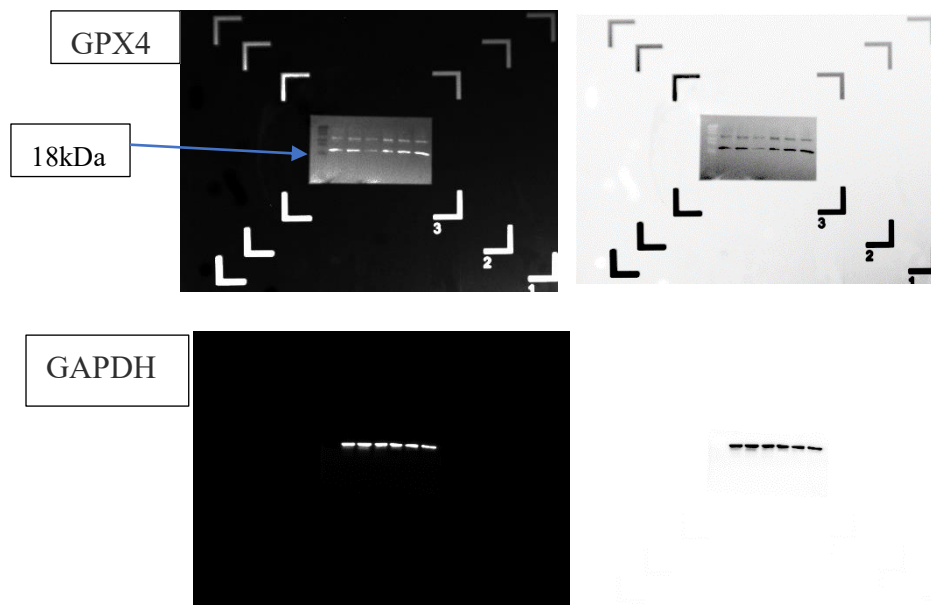

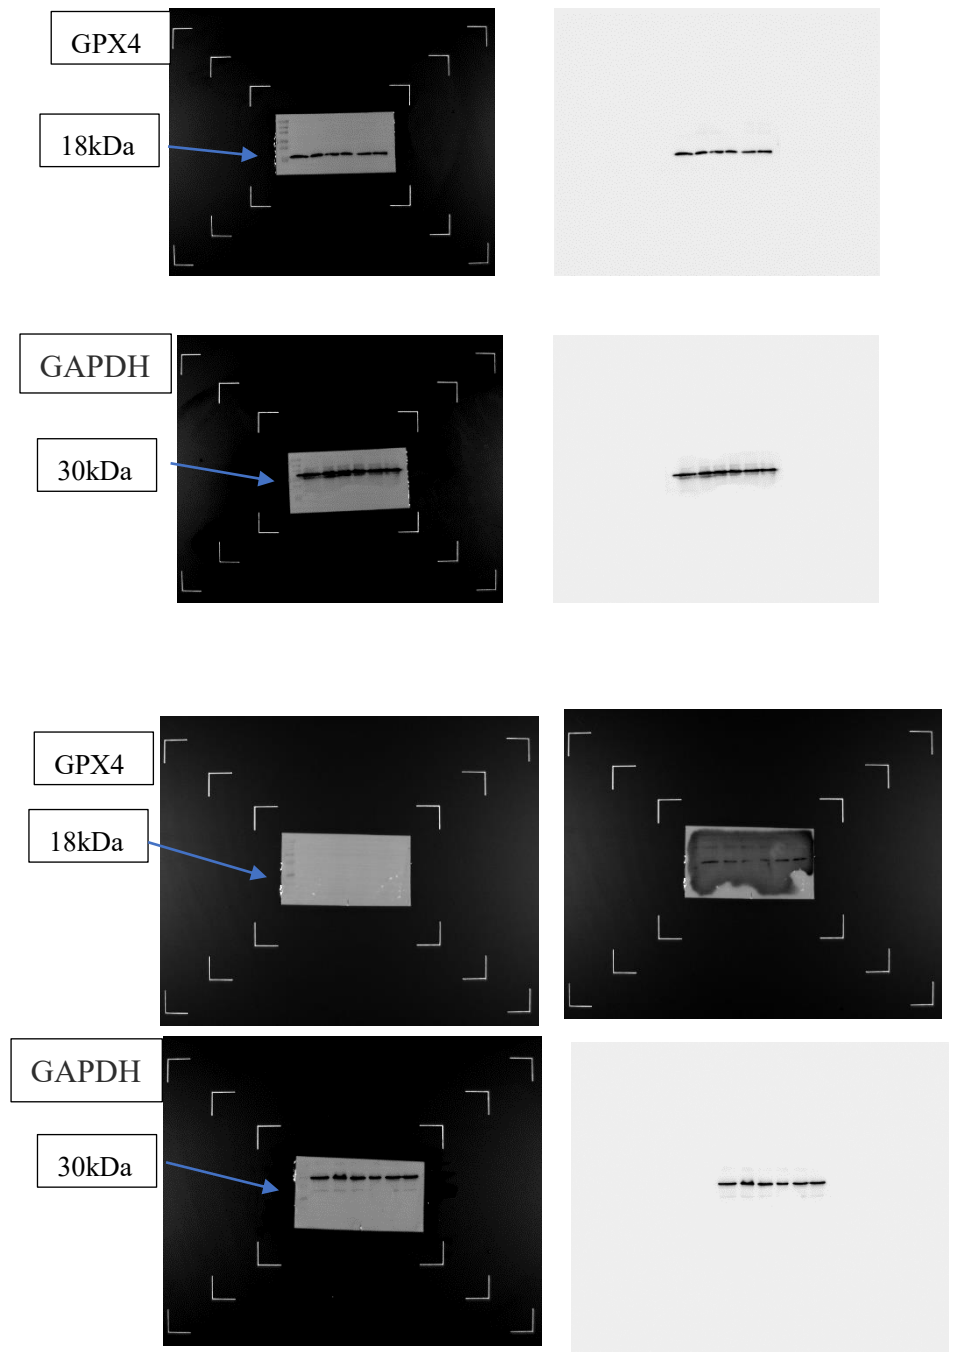

**Fig.4(H):** The raw data of Fig.4(H) is detailed in excel (Relative protein expression, Cell- GPX4/GAPDH).

**Fig.4(I):** The TEM images of Cell

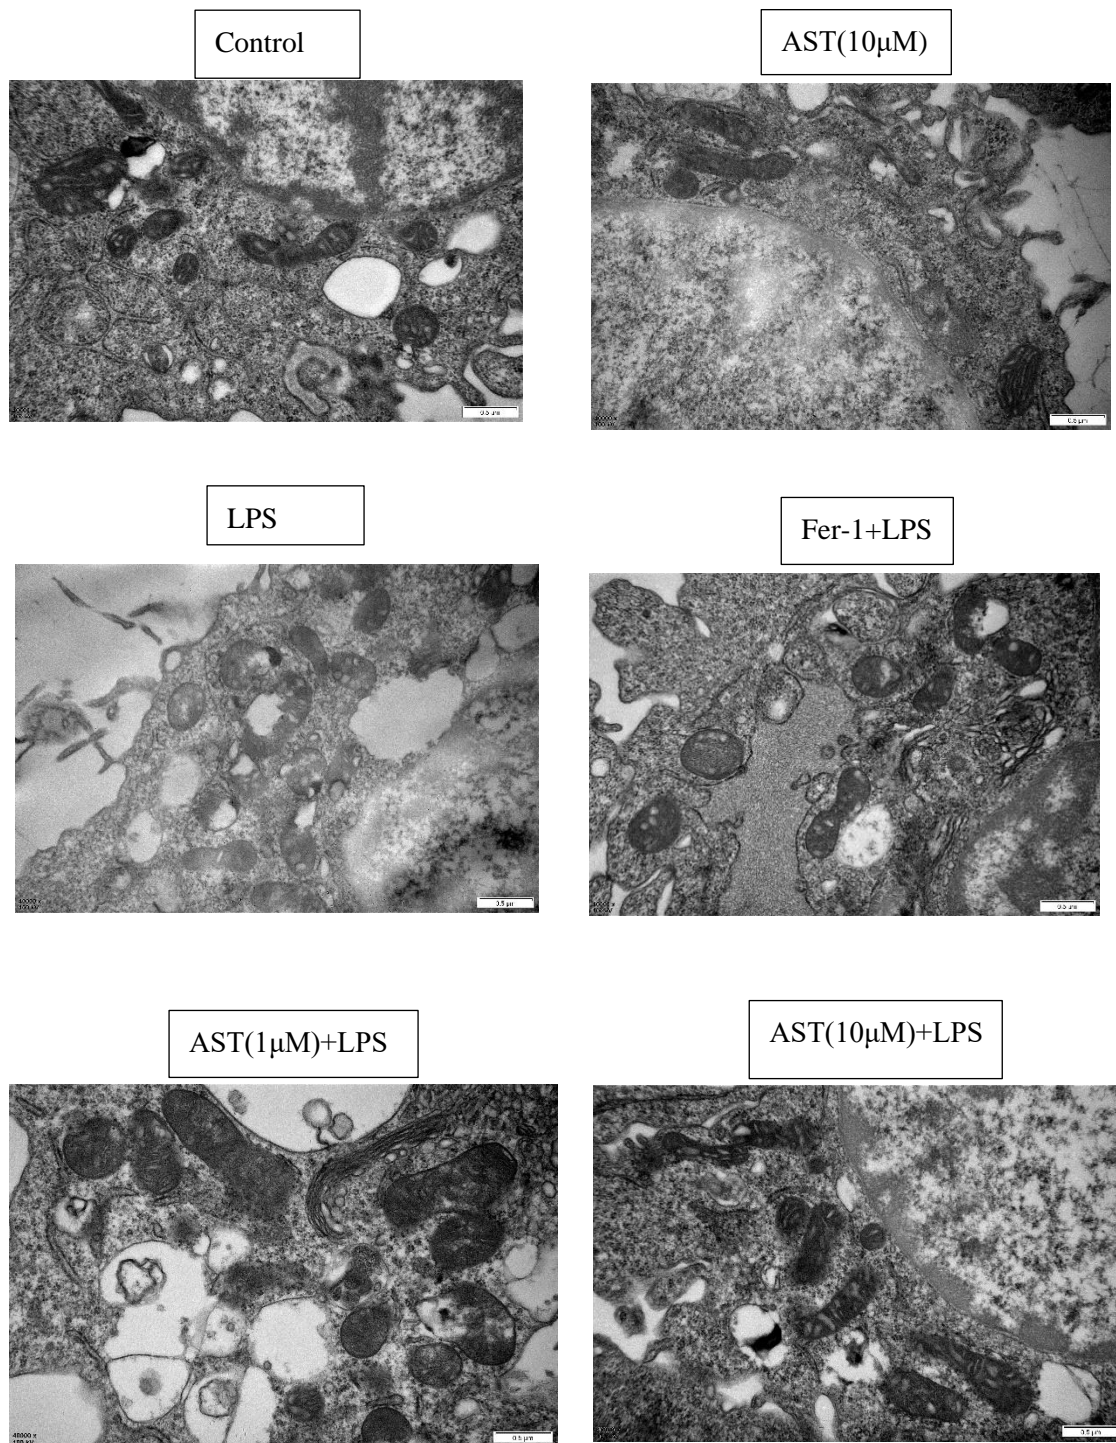

**Figure 5** AST suppressed ferroptosis in MLE-12 cells *via* inhibiting ferritinophagy.

**Fig.5(A):** The protein level of Ferritin in MLE-12 cells and the raw data of Fig.5(A) is detailed in excel (Relative protein expression, Ferritin/GAPDH).

Ferritin

23kDa

18kDa

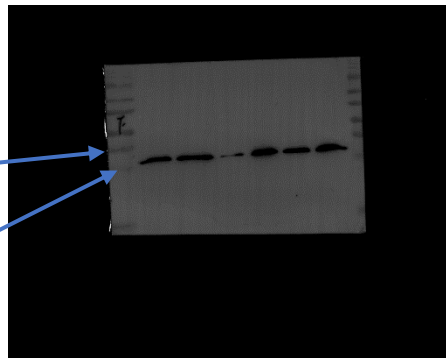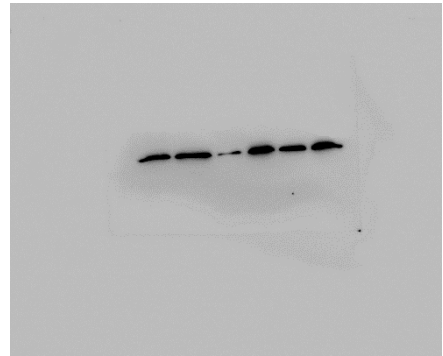

GAPDH

30kDa

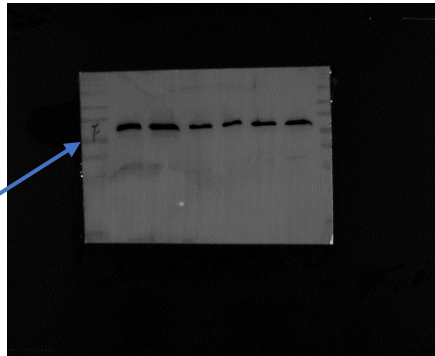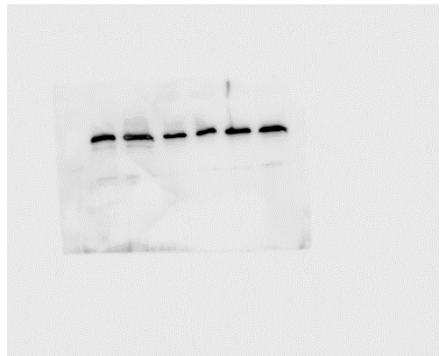

Ferritin

23kDa

18kDa

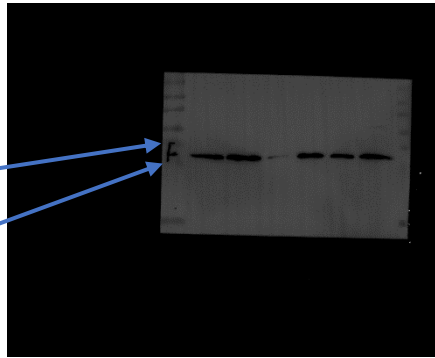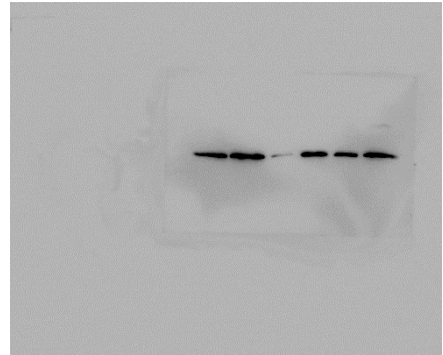

GAPDH

30kDa

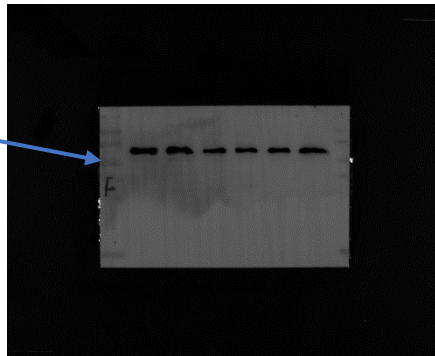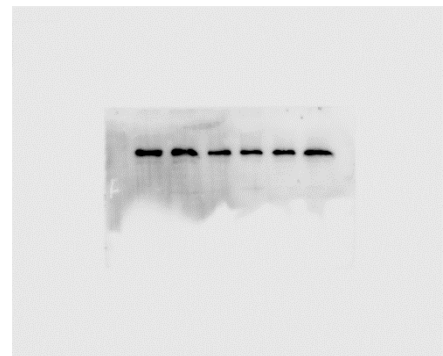



Ferritin

23kDa

18kDa

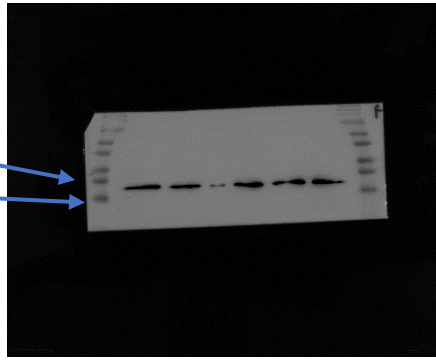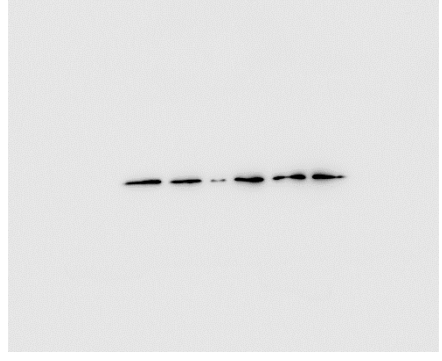

GAPDH

30kDa

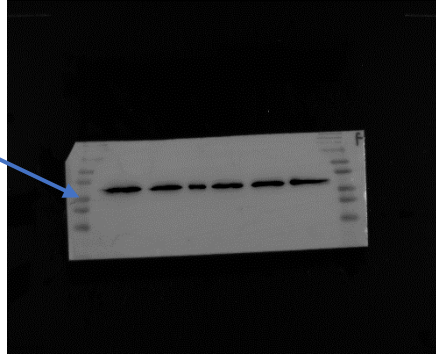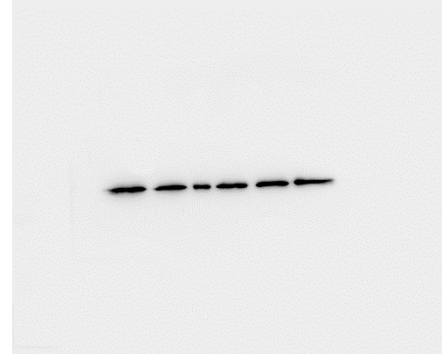

Ferritin

23kDa

18kDa

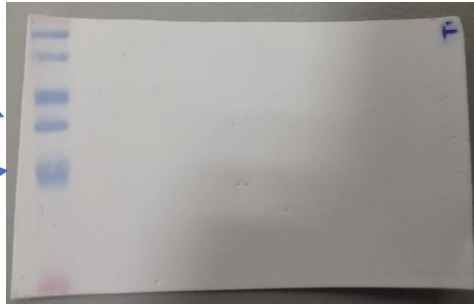

23kDa

18kDa

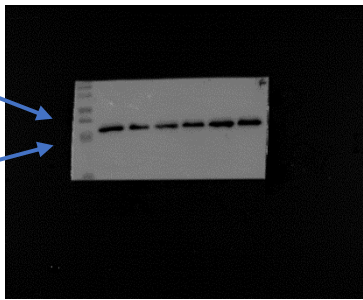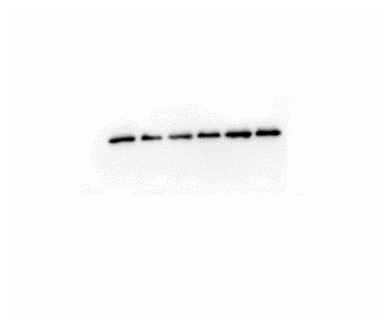

GAPDH

30kDa

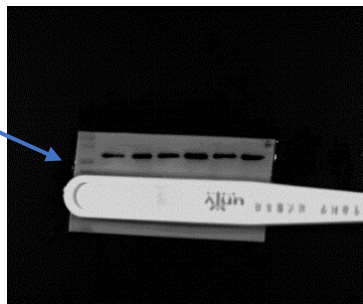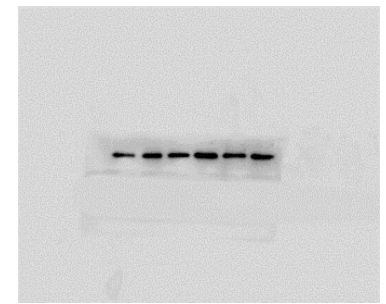

**Fig.5(B):** The protein level of NCOA4 in MLE-12 cells and the raw data of Fig.5(B) is detailed in excel (Relative protein expression, NCOA4  $\beta$ -Actin)

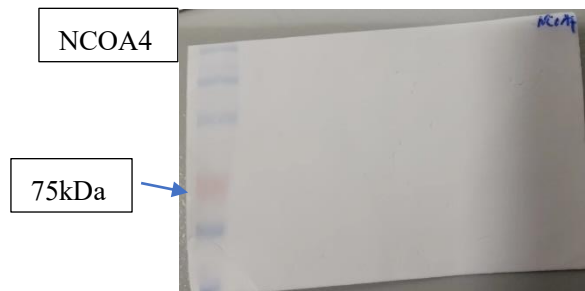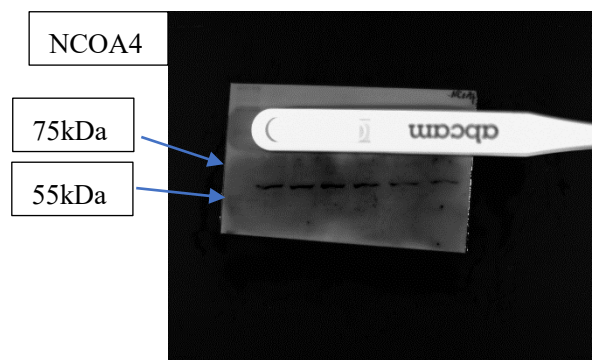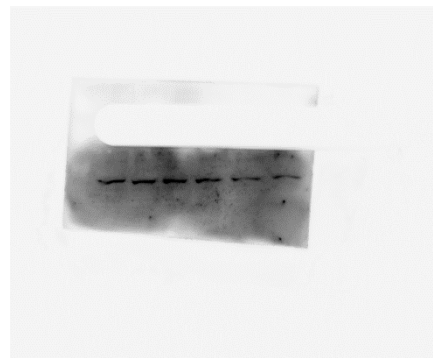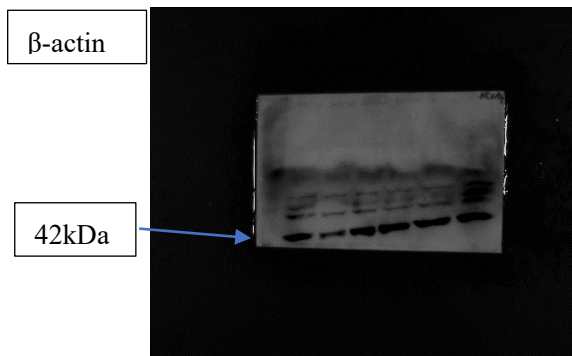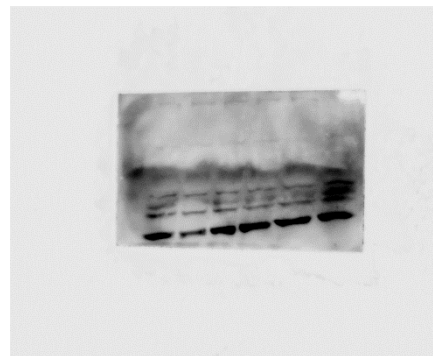

We used an object to block part of the image since the background of the membrane is a bit dirty, which influences how NCOA4 forms.

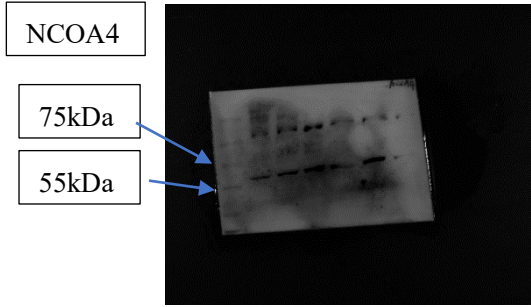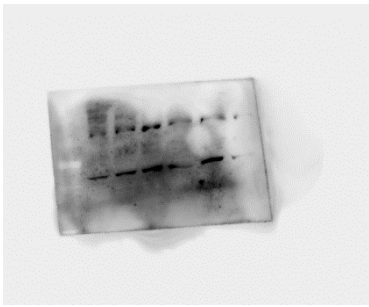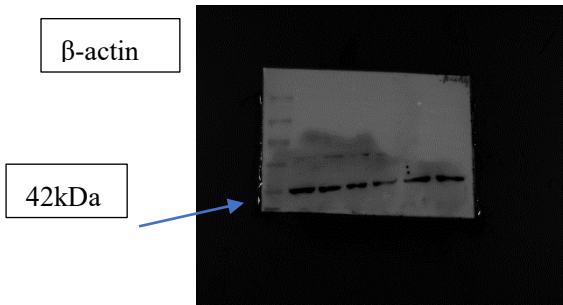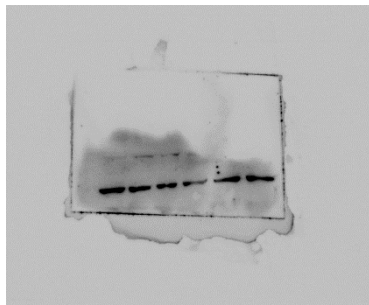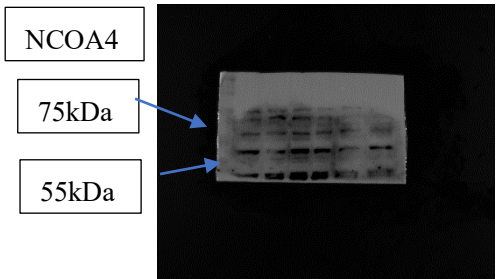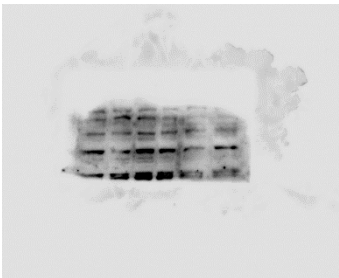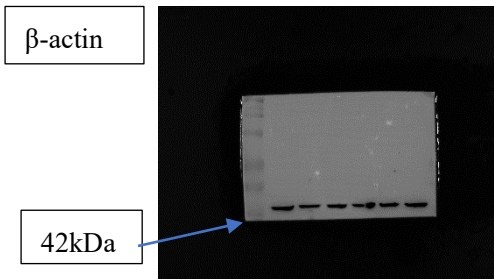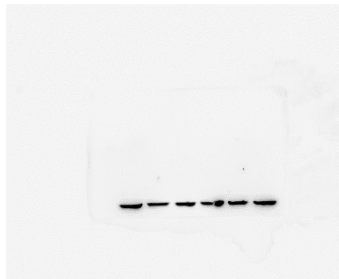

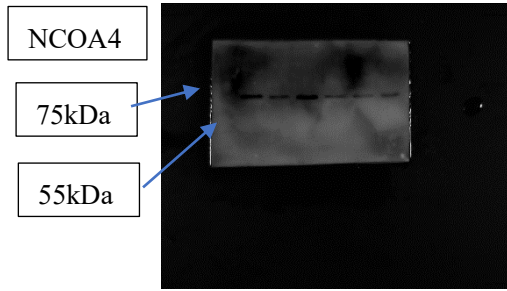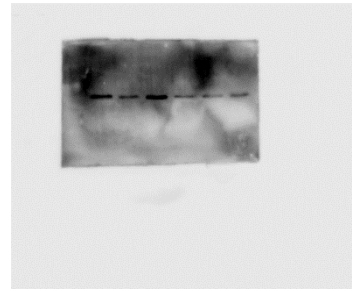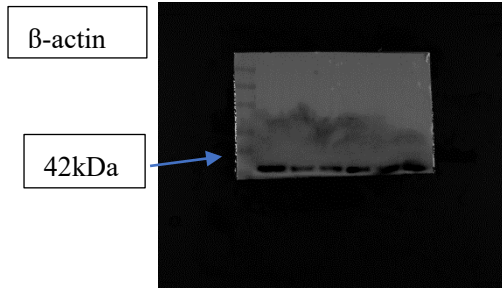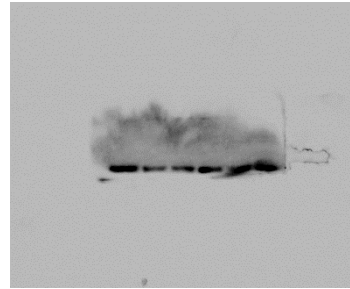

**Fig.5(C):** The protein level of Beclin1 in MLE-12 cells and the raw data of Fig.5(C) is detailed in excel (Relative protein expression, Beclin-1/GAPDH)

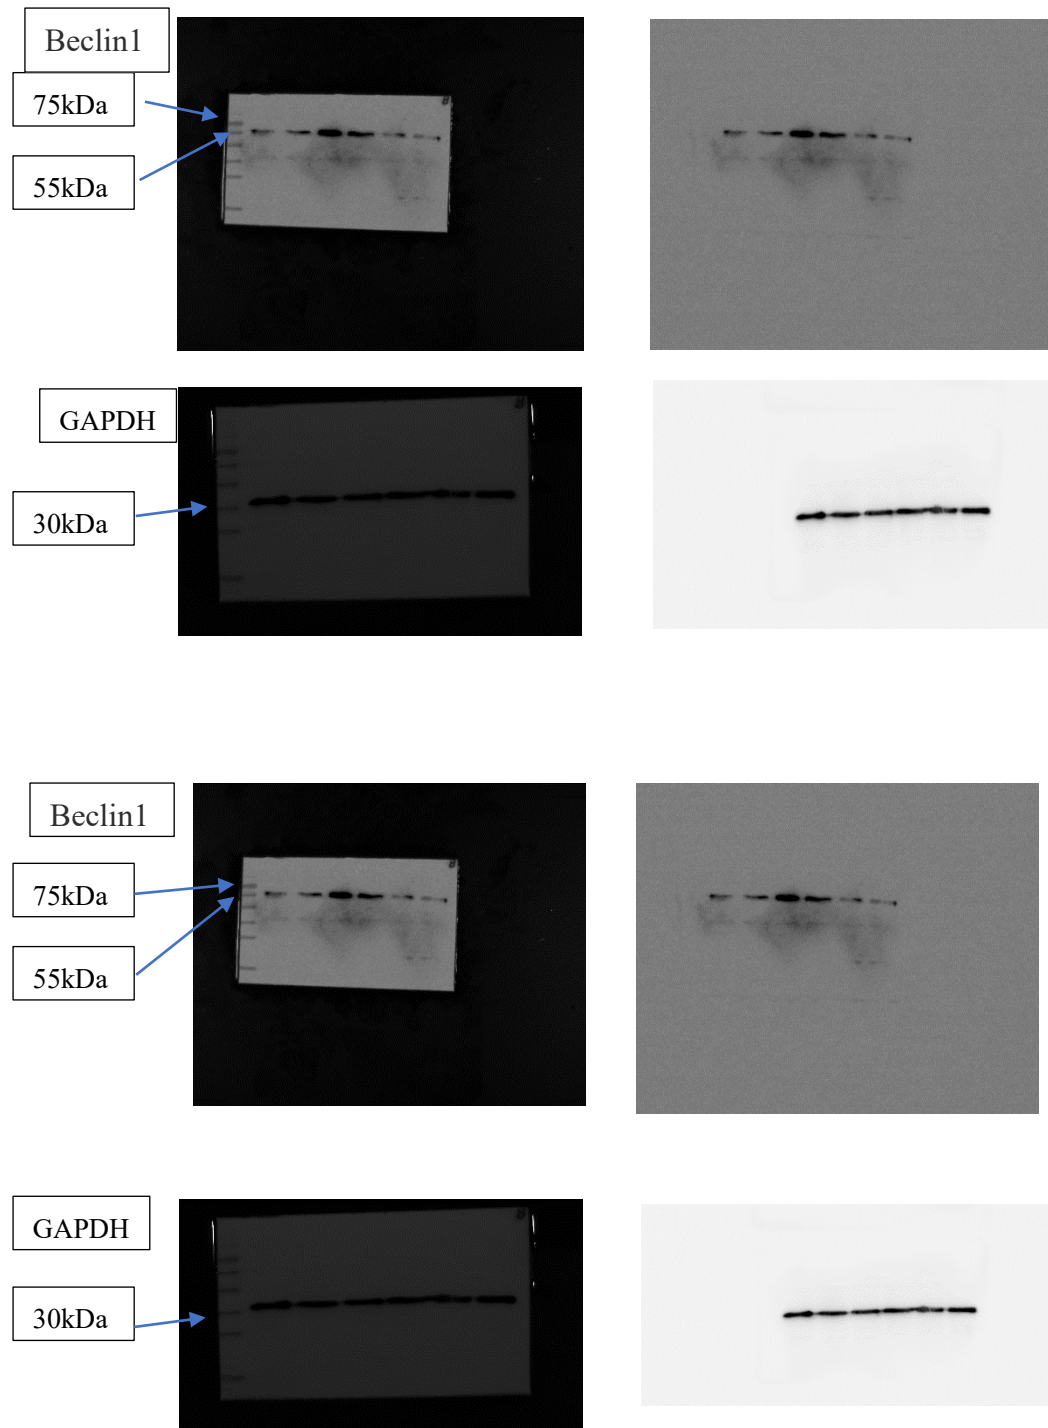

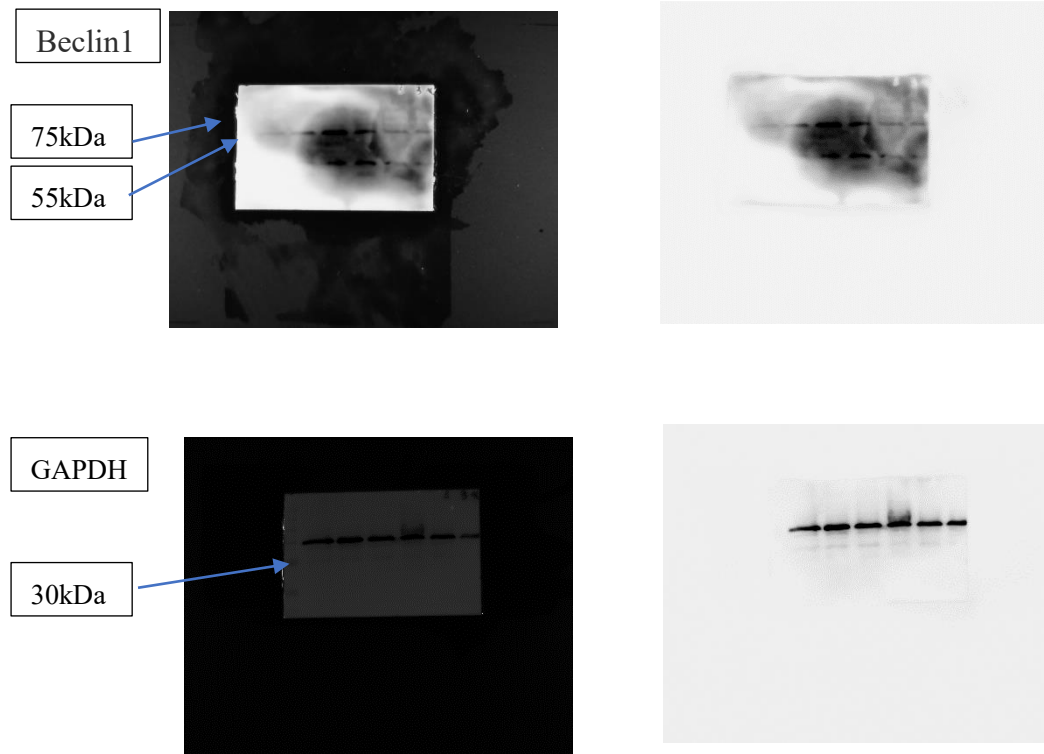

**Fig.5(D):** The protein level of LC3 in MLE-12 cells and the raw data of Fig.5(D) is detailed in excel (Relative protein expression, LC3B/GAPDH).

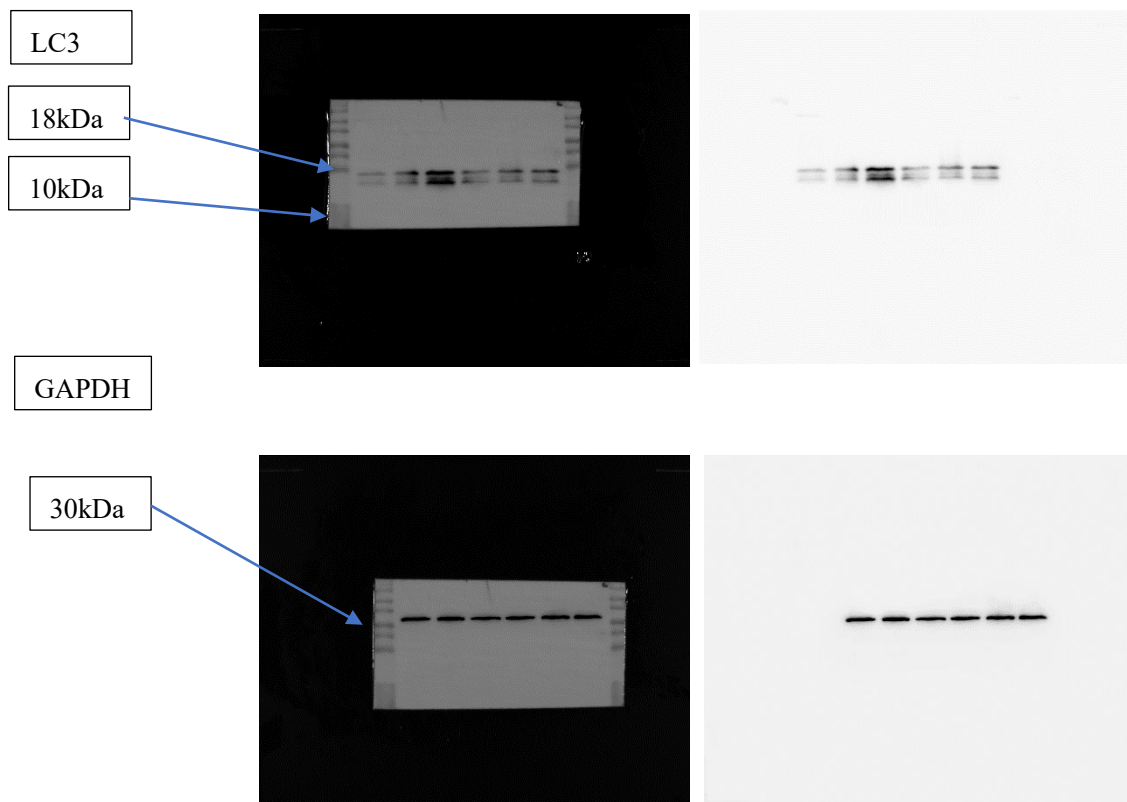

LC3

18kDa

10kDa

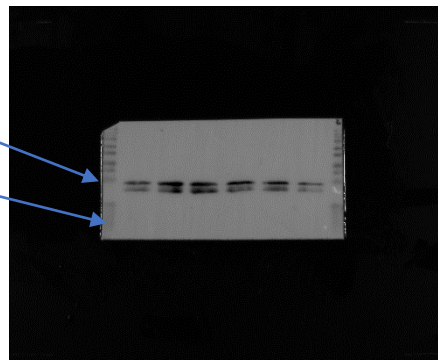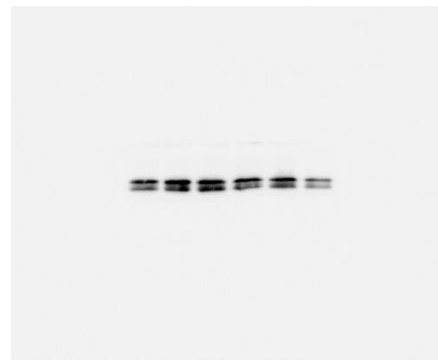

GAPDH

30kD

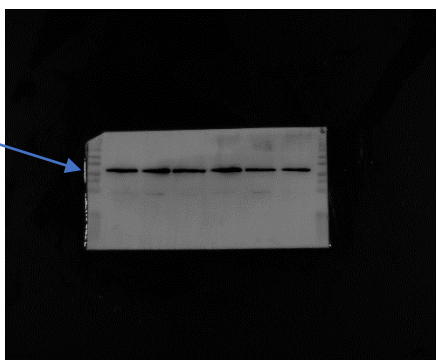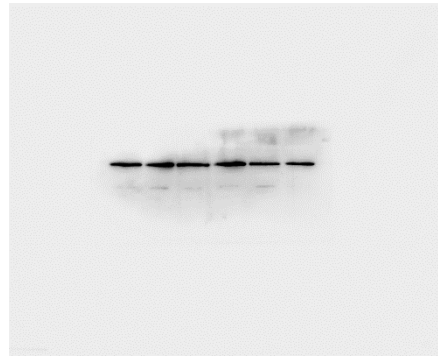

LC3

18kDa

10kDa

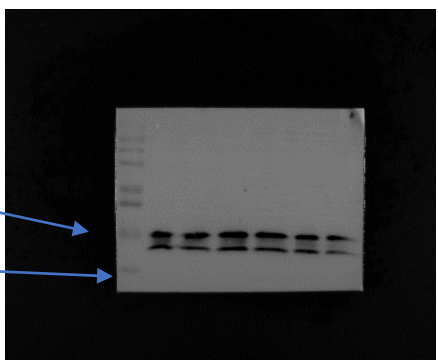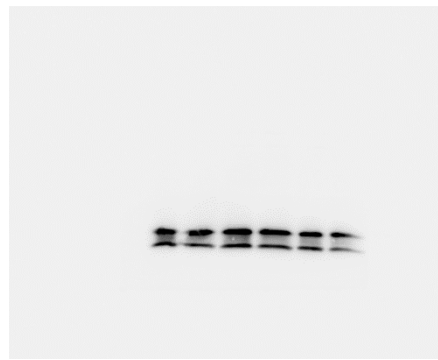

GAPDH

30kDa

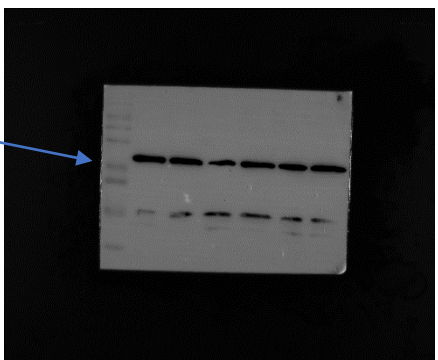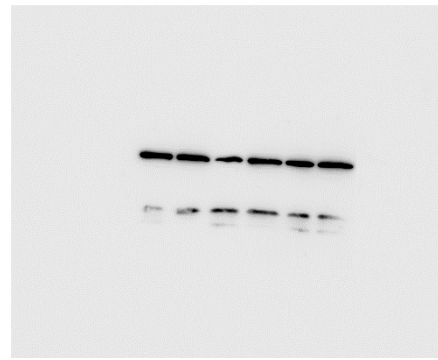

Supplement: d3fo01727c2.pdf [file d3fo01727c2.pdf]
